# Supplementary material for: Micronutrient Deficiency May Be Associated with the Onset of Chalkbrood Disease in Honey Bees
Source: MDPI journal article supplement (doi:10.3390/insects15040269), 2024-04-12
Supplement: s1 [file s1]

Text S1:

Calibration curve ranges:

0.0100–5.00  $\mu\text{g L}^{-1}$ : Li, V, Cr, Co, Ni, As, Se, Mo, Ag, Cd, Sn, Sb, Cs, Tl, Pb and U

0.1–50  $\mu\text{g L}^{-1}$ : B, Ba, Cu, Rb, and Sr

1.00–500  $\mu\text{g L}^{-1}$ : Al, Mn, Fe, Zn

100–50,000  $\mu\text{g L}^{-1}$ : Na, K, Ca, Mg, P and S

Table S1. Performance of the ICPMS

| Parameter                                                            | No-gas mode         | Collision mode      | Reaction mode       |
|----------------------------------------------------------------------|---------------------|---------------------|---------------------|
| Cell gas                                                             | -                   | He                  | H <sub>2</sub>      |
| <sup>7</sup> Li [CPS per $\mu\text{g L}^{-1}$ ]                      | 2.8*10 <sup>3</sup> | -                   | -                   |
| <sup>59</sup> Co [CPS per $\mu\text{g L}^{-1}$ ]                     | -                   | 2.6*10 <sup>3</sup> | 4.5*10 <sup>2</sup> |
| <sup>89</sup> Y [CPS per $\mu\text{g L}^{-1}$ ]                      | 17*10 <sup>3</sup>  | 3.3*10 <sup>3</sup> | 7.2*10 <sup>3</sup> |
| <sup>205</sup> Tl [CPS per $\mu\text{g L}^{-1}$ ]                    | 7.8*10 <sup>3</sup> | 6.3*10 <sup>4</sup> | 7.2*10 <sup>4</sup> |
| average RSD [%]                                                      | 2.5                 | 2.5                 | 3.5                 |
| <sup>140</sup> Ce <sup>16</sup> O/ <sup>140</sup> Ce [%]             | 1.7                 | 0.9                 | 2.4                 |
| <sup>140</sup> Ce <sup>2+</sup> / <sup>140</sup> Ce <sup>+</sup> [%] | 2.5                 | 0.7                 | 0.3                 |

Table S2. Selected mass, tune mode, internal standard and detection limits (LoD)

| Monitored isotope | Tune mode    | Internal standard | Detection limit*<br>( $\mu\text{g L}^{-1}$ ) |
|-------------------|--------------|-------------------|----------------------------------------------|
| $^7\text{Li}$     | No-gas       | $^9\text{Be}$     | 0.0028                                       |
| $^{11}\text{B}$   | No-gas       | $^9\text{Be}$     | 0.23                                         |
| $^{23}\text{Na}$  | He           | $^9\text{Be}$     | 27                                           |
| $^{24}\text{Mg}$  | He           | $^9\text{Be}$     | 11                                           |
| $^{27}\text{Al}$  | No-gas       | $^9\text{Be}$     | 9.3                                          |
| $^{31}\text{P}$   | He           | $^9\text{Be}$     | 27                                           |
| $^{32}\text{S}$   | He           | $^9\text{Be}$     | 1641                                         |
| $^{39}\text{K}$   | He           | $^9\text{Be}$     | 9.8                                          |
| $^{43}\text{Ca}$  | He           | $^9\text{Be}$     | 154                                          |
| $^{51}\text{V}$   | He           | $^{74}\text{Ge}$  | 0.02                                         |
| $^{53}\text{Cr}$  | He           | $^{74}\text{Ge}$  | 0.08                                         |
| $^{55}\text{Mn}$  | He           | $^{74}\text{Ge}$  | 0.09                                         |
| $^{56}\text{Fe}$  | He           | $^{74}\text{Ge}$  | 2.7                                          |
| $^{59}\text{Co}$  | He           | $^{74}\text{Ge}$  | 0.004                                        |
| $^{60}\text{Ni}$  | He           | $^{74}\text{Ge}$  | 0.9                                          |
| $^{65}\text{Cu}$  | He           | $^{74}\text{Ge}$  | 0.62                                         |
| $^{66}\text{Zn}$  | He           | $^{74}\text{Ge}$  | 9.3                                          |
| $^{75}\text{As}$  | He           | $^{74}\text{Ge}$  | 0.006                                        |
| $^{78}\text{Se}$  | $\text{H}_2$ | $^{74}\text{Ge}$  | 0.01                                         |
| $^{85}\text{Rb}$  | He           | $^{74}\text{Ge}$  | 0.023                                        |
| $^{88}\text{Sr}$  | He           | $^{74}\text{Ge}$  | 0.1                                          |
| $^{98}\text{Mo}$  | No-gas       | $^{74}\text{Ge}$  | 0.02                                         |
| $^{107}\text{Ag}$ | No-gas       | $^{115}\text{In}$ | 0.003                                        |
| $^{111}\text{Cd}$ | No-gas       | $^{115}\text{In}$ | 0.009                                        |
| $^{118}\text{Sn}$ | No-gas       | $^{115}\text{In}$ | 0.05                                         |
| $^{121}\text{Sb}$ | No-gas       | $^{115}\text{In}$ | 0.02                                         |
| $^{133}\text{Cs}$ | No-gas       | $^{115}\text{In}$ | 0.002                                        |
| $^{137}\text{Ba}$ | No-gas       | $^{115}\text{In}$ | 0.17                                         |
| $^{205}\text{Tl}$ | No-gas       | $^{175}\text{Lu}$ | 0.0012                                       |
| $^{208}\text{Pb}$ | No-gas       | $^{175}\text{Lu}$ | 0.03                                         |
| $^{238}\text{U}$  | No-gas       | $^{175}\text{Lu}$ | 0.0003                                       |

\*LoD =  $\text{mean}_{\text{blanks}} + 3 \cdot \sigma_{\text{blanks}}$

Table S3. Certified and determined values for elements in NIST SRM 1643f Trace Elements in Natural Water

| Element | Cert. mass conc. [ $\mu\text{g kg}^{-1}$ ] |       |        | Analyzed mass conc. [ $\mu\text{g kg}^{-1}$ ] |       |       |
|---------|--------------------------------------------|-------|--------|-----------------------------------------------|-------|-------|
|         |                                            |       |        | (n=3)                                         |       |       |
| Li      | 16.42                                      | $\pm$ | 0.35   | 15.93                                         | $\pm$ | 0.16  |
| B       | 150.8                                      | $\pm$ | 6.6    | 140.5                                         | $\pm$ | 1.4   |
| Na      | 18640                                      | $\pm$ | 240    | 23572                                         | $\pm$ | 872   |
| Mg      | 7380                                       | $\pm$ | 58     | 7242                                          | $\pm$ | 333   |
| Al      | 132.5                                      | $\pm$ | 1.2    | 139.8                                         | $\pm$ | 2.2   |
| K       | 1913.3                                     | $\pm$ | 9.0    | 2041                                          | $\pm$ | 51    |
| Ca      | 29140                                      | $\pm$ | 320    | 28440                                         | $\pm$ | 170   |
| V       | 35.71                                      | $\pm$ | 0.27   | 32.32                                         | $\pm$ | 0.71  |
| Cr      | 18.32                                      | $\pm$ | 0.10   | 17.12                                         | $\pm$ | 0.38  |
| Mn      | 36.77                                      | $\pm$ | 0.58   | 36.9                                          | $\pm$ | 1.2   |
| Fe      | 92.51                                      | $\pm$ | 0.77   | 90.7                                          | $\pm$ | 2.2   |
| Co      | 25.05                                      | $\pm$ | 0.17   | 23.30                                         | $\pm$ | 0.42  |
| Ni      | 59.2                                       | $\pm$ | 1.4    | 52.68                                         | $\pm$ | 0.95  |
| Cu      | 21.44                                      | $\pm$ | 0.70   | 21.39                                         | $\pm$ | 0.53  |
| Zn      | 73.7                                       | $\pm$ | 1.7    | 331.3                                         | $\pm$ | 6.3   |
| As      | 56.85                                      | $\pm$ | 0.37   | 55.9                                          | $\pm$ | 1.6   |
| Se      | 11.583                                     | $\pm$ | 0.078  | 10.82                                         | $\pm$ | 0.41  |
| Rb      | 12.51                                      | $\pm$ | 0.12   | 11.94                                         | $\pm$ | 0.31  |
| Sr      | 311                                        | $\pm$ | 18     | 183.2                                         | $\pm$ | 6.2   |
| Mo      | 114.2                                      | $\pm$ | 1.7    | 109.26                                        | $\pm$ | 0.76  |
| Ag      | 0.9606                                     | $\pm$ | 0.0053 | 1.320                                         | $\pm$ | 0.026 |
| Cd      | 5.83                                       | $\pm$ | 0.13   | 7.17                                          | $\pm$ | 0.12  |
| Sb      | 54.90                                      | $\pm$ | 0.39   | 54.36                                         | $\pm$ | 0.38  |
| Ba      | 513.1                                      | $\pm$ | 7.3    | 467.2                                         | $\pm$ | 4.7   |
| Tl      | 6.823                                      | $\pm$ | 0.034  | 6.715                                         | $\pm$ | 0.060 |
| Pb      | 18.303                                     | $\pm$ | 0.081  | 19.52                                         | $\pm$ | 0.23  |

Table S4 Certified and determined values for elements in CRM BOVN-1 Bovine Muscle Powder  
(\*information values)

| Element | Cert. mass conc. [mg kg <sup>-1</sup> ] |   |       | Analyzed mass conc. [mg kg <sup>-1</sup> ] (n=6) |   |         |
|---------|-----------------------------------------|---|-------|--------------------------------------------------|---|---------|
| B       | 600                                     | ± | 400   | 236                                              | ± | 37      |
| Na      | 2100                                    | ± | 100   | 1779                                             | ± | 14      |
| Mg      | 960                                     | ± | 95    | 875.1                                            | ± | 76      |
| Al*     | 1.7                                     | ± | /     | 0.82                                             | ± | 0.38    |
| P       | 8360                                    | ± | 450   | 7055                                             | ± | 51      |
| S*      | 8000                                    | ± | /     | 6787                                             | ± | 63      |
| K       | 15200                                   | ± | 400   | 13691                                            | ± | 110     |
| Ca      | 145                                     | ± | 20    | 130.2                                            | ± | 7.8     |
| V*      | 0.005                                   | ± | /     | 0.0030                                           | ± | 0.0013  |
| Cr*     | 0.071                                   | ± | /     | 0.053                                            | ± | 0.036   |
| Mn      | 0.37                                    | ± | 0.09  | 0.308                                            | ± | 0.011   |
| Fe      | 71.2                                    | ± | 9.2   | 63.2                                             | ± | 1.3     |
| Co      | 0.007                                   | ± | 0.003 | 0.00552                                          | ± | 0.00022 |
| Ni*     | 0.05                                    | ± | /     | 0                                                | ± | /       |
| Cu      | 2.84                                    | ± | 0.45  | 2.412                                            | ± | 0.021   |
| Zn      | 142                                     | ± | 14    | 130.4                                            | ± | 1.3     |
| As      | 0.009                                   | ± | 0.003 | 0.0085                                           | ± | 0.0013  |
| Se      | 0.076                                   | ± | 0.010 | 0.0625                                           | ± | 0.0040  |
| Rb      | 28.7                                    | ± | 3.5   | 24.23                                            | ± | 0.35    |
| Sr      | 0.052                                   | ± | 0.015 | 0.0517                                           | ± | 0.0052  |
| Mo      | 0.08                                    | ± | 0.06  | 0.0618                                           | ± | 0.0017  |
| Cd      | 0.013                                   | ± | 0.011 | 0.01045                                          | ± | 0.00098 |
| Sb*     | 0.01                                    | ± | /     | 0.0038                                           | ± | 0.0038  |
| Cs*     | 0.05                                    | ± | /     | 0.03070                                          | ± | 0.00042 |
| Ba*     | 0.05                                    | ± | /     | 0.0161                                           | ± | 0.0057  |
| Pb      | 0.38                                    | ± | 0.024 | 0.39                                             | ± | 0.13    |

Table S5. Descriptive statistics and ANOVA (mg kg<sup>-1</sup> dry weight  $\pm$  standard deviation) (n=12)

| Element | Rural apiary with signs of disease |           |                                   |           |                      |                                     | Urban, Disease-free apiary |            |                                         |  |  |  | ANOVA |
|---------|------------------------------------|-----------|-----------------------------------|-----------|----------------------|-------------------------------------|----------------------------|------------|-----------------------------------------|--|--|--|-------|
|         | Mummy                              |           | Healthy Larvae from infected hive |           |                      | Healthy Larvae from uninfected hive |                            |            | Healthy Larvae from disease-free apiary |  |  |  |       |
| Li      | 0.02274 <sup>a</sup>               | ± 0.00017 | 0.0271 <sup>b</sup>               | ± 0.001   | 0.02687 <sup>b</sup> | ± 0.00022                           | 0.01518 <sup>c</sup>       | ± 0.00023  | F(3,8)=328.504, p<0.0001                |  |  |  |       |
| B       | 1.34 <sup>a</sup>                  | ± 0.046   | 8.7 <sup>b</sup>                  | ± 0.12    | 6.162 <sup>c</sup>   | ± 0.056                             | 9.142 <sup>d</sup>         | ± 0.091    | F(3,8)=5587.784, p<0.0001               |  |  |  |       |
| Na      | 391.8 <sup>a</sup>                 | ± 6.5     | 180.8 <sup>b</sup>                | ± 5.3     | 212.5 <sup>c</sup>   | ± 6.1                               | 250.6 <sup>d</sup>         | ± 6.5      | F(3,8)=692.143, p<0.0001                |  |  |  |       |
| Mg      | 1113 <sup>a</sup>                  | ± 21      | 852 <sup>b</sup>                  | ± 21      | 972 <sup>c</sup>     | ± 29                                | 1016 <sup>c</sup>          | ± 27       | F(3,8)=59.013, p<0.0001                 |  |  |  |       |
| Al      | 6.21 <sup>a</sup>                  | ± 0.2     | 8.89 <sup>a</sup>                 | ± 0.99    | 21.86 <sup>b</sup>   | ± 0.97                              | 22.1 <sup>b</sup>          | ± 1.9      | F(3,8)=153.717, p<0.0001                |  |  |  |       |
| P       | 8190 <sup>a</sup>                  | ± 120     | 5620 <sup>b</sup>                 | ± 130     | 7640 <sup>c</sup>    | ± 200                               | 7360 <sup>c</sup>          | ± 190      | F(3,8)=137.794, p<0.0001                |  |  |  |       |
| S       | 3954 <sup>a</sup>                  | ± 25      | 2510 <sup>b</sup>                 | ± 110     | 3070 <sup>c</sup>    | ± 140                               | 2812 <sup>c</sup>          | ± 99       | F(3,8)=108.255, p<0.0001                |  |  |  |       |
| K       | 15390 <sup>a</sup>                 | ± 210     | 8950 <sup>b</sup>                 | ± 190     | 11760 <sup>c</sup>   | ± 320                               | 11190 <sup>c</sup>         | ± 300      | F(3,8)=308.893, p<0.0001                |  |  |  |       |
| Ca      | 638 <sup>a</sup>                   | ± 16      | 455 <sup>b</sup>                  | ± 12      | 592.2 <sup>c</sup>   | ± 8.4                               | 548 <sup>d</sup>           | ± 11       | F(3,8)=123.870, p<0.0001                |  |  |  |       |
| V       | 0.0049 <sup>a</sup>                | ± 0.0022  | 0.0006 <sup>a</sup>               | ± 0.0011  | 0.02608 <sup>b</sup> | ± 0.00057                           | 0.0214 <sup>b</sup>        | ± 0.0036   | F(3,8)=53.279, p=0.0001                 |  |  |  |       |
| Cr      | 2.353 <sup>a</sup>                 | ± 0.086   | 0.444 <sup>b</sup>                | ± 0.046   | 4.83 <sup>c</sup>    | ± 0.1                               | 3.81 <sup>d</sup>          | ± 0.52     | F(3,8)=150.608, p<0.0001                |  |  |  |       |
| Mn      | 2.867 <sup>a</sup>                 | ± 0.033   | 2.243 <sup>b</sup>                | ± 0.034   | 5.789 <sup>c</sup>   | ± 0.074                             | 4.324 <sup>d</sup>         | ± 0.054    | F(3,8)=2819.921, p<0.0001               |  |  |  |       |
| Fe      | 53.3 <sup>a</sup>                  | ± 1.1     | 28.43 <sup>b</sup>                | ± 0.62    | 66.9 <sup>c</sup>    | ± 1.0                               | 53.2 <sup>a</sup>          | ± 2.1      | F(3,8)=424.605, p<0.0001                |  |  |  |       |
| Co      | 0.09773 <sup>a</sup>               | ± 0.00086 | 0.093 <sup>a</sup>                | ± 0.0024  | 0.1807 <sup>b</sup>  | ± 0.0013                            | 0.1722 <sup>b</sup>        | ± 0.0071   | F(3,8)=449.773, p<0.0001                |  |  |  |       |
| Ni      | 1.028 <sup>a</sup>                 | ± 0.043   | 0.069 <sup>b</sup>                | ± 0.042   | 2.597 <sup>c</sup>   | ± 0.074                             | 1.92 <sup>d</sup>          | ± 0.31     | F(3,8)=135.016, p<0.0001                |  |  |  |       |
| Cu      | 16.57 <sup>a</sup>                 | ± 0.29    | 12.32 <sup>b</sup>                | ± 0.19    | 19.19 <sup>c</sup>   | ± 0.27                              | 18.97 <sup>c</sup>         | ± 0.16     | F(3,8)=557.596, p<0.0001                |  |  |  |       |
| Zn      | 64.6 <sup>a</sup>                  | ± 1.9     | 58.13 <sup>b</sup>                | ± 0.48    | 88.6 <sup>c</sup>    | ± 1.2                               | 77.19 <sup>d</sup>         | ± 0.68     | F(3,8)=397.611, p<0.0001                |  |  |  |       |
| As      | 0.1332 <sup>a</sup>                | ± 0.0085  | 0.1521 <sup>b</sup>               | ± 0.0017  | 0.2635 <sup>c</sup>  | ± 0.0022                            | 0.2505 <sup>c</sup>        | ± 0.0078   | F(3,8)=379.237, p<0.0001                |  |  |  |       |
| Se      | 0.183 <sup>a</sup>                 | ± 0.0087  | 0.1253 <sup>b</sup>               | ± 0.0038  | 0.2121 <sup>c</sup>  | ± 0.0033                            | 0.063 <sup>d</sup>         | ± 0.0019   | F(3,8)=501.709, p<0.0001                |  |  |  |       |
| Rb      | 6.85 <sup>a</sup>                  | ± 0.075   | 3.75 <sup>b</sup>                 | ± 0.047   | 5.175 <sup>c</sup>   | ± 0.052                             | 4.12 <sup>d</sup>          | ± 0.048    | F(3,8)=1806.510, P<0.0001               |  |  |  |       |
| Sr      | 0.2297 <sup>a</sup>                | ± 0.0015  | 0.29 <sup>b</sup>                 | ± 0.01    | 0.6361 <sup>c</sup>  | ± 0.0086                            | 0.5954 <sup>d</sup>        | ± 0.0038   | F(3,8)=2679.616, p<0.0001               |  |  |  |       |
| Mo      | 0.3468 <sup>a</sup>                | ± 0.0064  | 0.2498 <sup>b</sup>               | ± 0.0045  | 0.3672 <sup>c</sup>  | ± 0.0036                            | 0.3295 <sup>d</sup>        | ± 0.0032   | F(3,8)=377.805, p<0.0001                |  |  |  |       |
| Ag      | 2.786 <sup>a</sup>                 | ± 0.029   | 5.211 <sup>b</sup>                | ± 0.07    | 5.11 <sup>b</sup>    | ± 0.11                              | 5.024 <sup>b</sup>         | ± 0.062    | F(3,8)=790.820, p<0.0001                |  |  |  |       |
| Cd      | 0.02115 <sup>a</sup>               | ± 0.00097 | 0.03026 <sup>b</sup>              | ± 0.00025 | 0.0488 <sup>c</sup>  | ± 0.0015                            | 0.04347 <sup>d</sup>       | ± 0.00092  | F(3,8)=452.412, p<0.0001                |  |  |  |       |
| Sn      | 0.7 <sup>a</sup>                   | ± 1.2     | 0.0161 <sup>a</sup>               | ± 0.0037  | 0.02726 <sup>a</sup> | ± 0.00075                           | 0.36 <sup>a</sup>          | ± 0.59     | F(3,8)=0.736, p=0.560                   |  |  |  |       |
| Sb      | 1.49 <sup>a</sup>                  | ± 0.14    | 2.384 <sup>b</sup>                | ± 0.033   | 3.336 <sup>c</sup>   | ± 0.052                             | 3.139 <sup>c</sup>         | ± 0.051    | F(3,8)=323.140, p<0.0001                |  |  |  |       |
| Cs      | 0.00278 <sup>a</sup>               | ± 0.00018 | 0.00228 <sup>a</sup>              | ± 0.00013 | 0.00402 <sup>b</sup> | ± 0.0003                            | 0.003461 <sup>c</sup>      | ± 0.000096 | F(3,8)=46.550, p<0.0001                 |  |  |  |       |
| Ba      | 1.923 <sup>a</sup>                 | ± 0.027   | 3.57 <sup>b</sup>                 | ± 0.1     | 4.42 <sup>c</sup>    | ± 0.11                              | 3.81 <sup>b</sup>          | ± 0.11     | F(3,8)=386.508, p<0.0001                |  |  |  |       |
| Pb      | 1.28 <sup>a</sup>                  | ± 0.15    | 2.301 <sup>b</sup>                | ± 0.078   | 2.964 <sup>c</sup>   | ± 0.061                             | 2.528 <sup>b</sup>         | ± 0.013    | F(3,8)=194.467, p<0.0001                |  |  |  |       |

\*different superscript lower case letters represent statistically significant differences
